# Supplementary material for: Anti-Inflammatory Effects of a Polyphenol, Catechin-7,4′-O-Digallate, from Woodfordia uniflora by Regulating NF-κB Signaling Pathway in Mouse Macrophages
Source: PubMed Central journal article supplement (PMC8003360; doi:10.3390/pharmaceutics13030408), 2021-03-19
Supplement: pharmaceutics-13-00408-s001.pdf [file pharmaceutics-13-00408-s001.pdf]

# Supplementary Materials: Anti-inflammatory Effects of a Polyphenol, Catechin-7,4'-O-digallate, from *Woodfordia uniflora* by Regulating NF- $\kappa$ B Signaling Pathway in Mouse Macrophages

Seoyoung Lee, Eui Jin Kim, Jae Sik Yu, Ji Bin Seo, Jae Sung Lim, Jeong Uk Choi, Chang-Min Lee, Luay Rshan, Ki Hyun Kim\*, and Young-Chang Cho\*

## General experimental procedure

Optical rotation was measured using Jasco P-2000 polarimeter (Jasco, Easton, MD, USA). Ultraviolet (UV) spectra were obtained using Agilent 8453 UV-visible spectrophotometer (Agilent Technologies, Santa Clara, CA, USA). Nuclear magnetic resonance (NMR) spectra were obtained using Bruker AVANCE III 850 NMR spectrometer with 5 mm TCI CryoProbe, operating at 850 MHz ( $^1\text{H}$ ) and 212.5 MHz ( $^{13}\text{C}$ ), with the chemical shift values being represented as parts per million (ppm). Preparative high-performance liquid chromatography (HPLC) was performed using a Waters 1525 Binary HPLC pump with Waters 996 Photodiode Array Detector (Waters Corporation, Milford, CT, USA). Semi-preparative HPLC was performed using the Shimadzu Prominence HPLC System with SPD-20A/20AV Series Prominence HPLC UV-Vis Detectors (Shimadzu, Tokyo, Japan). LC/MS analysis was performed on an Agilent 1200 Series HPLC system, equipped with a diode array detector and 6130 Series ESI mass spectrometer. An analytical Kinetex  $\text{C}_{18}$  100 Å column (100 × 2.1 mm, 5  $\mu\text{m}$ ; flow rate: 0.3 ml/min; Phenomenex) was used. Furthermore, the Dianion HP-20 system (Mitsubishi Chemical, Tokyo, Japan) along with silica gel 60 (Merck, 230–400 mesh) and RP- $\text{C}_{18}$  silica gel (Merck, 40–63  $\mu\text{m}$ ) were used for column chromatography, Merck pre-coated Silica gel F254 plates and RP-18 F254s plates (Merck, Darmstadt, Germany) were used for thin-layer chromatography (TLC). The plates were visualized under UV light or by heating after spraying with anisaldehyde-sulfuric acid until the development of spots.

## Plant material

Leaves of *W. uniflora* were collected from the valleys of Ain Jarziz, which is approximately 17–18 km east of Salalah, Dhofar (Oman), during June–August 2017. The leaves were dried at room temperature, macerated into a fine powder, and stored at room temperature. The plant was classified by Alan Radcliffe-Smith (Royal Botanic Gardens Kew, England) [1]. A voucher specimen of the material (W-2017) was deposited at the Biology Department, Sultan Qaboos University, Sultanate of Oman.

## Reference

1. Miller, A.G.; Morris, M.; Stuart-Smith, S. *Plants of Dhofar, the southern region of Oman: traditional, economic, and medicinal uses*; Office of the Advisor for Conservation of the Environment, Diwan of Royal Court., Sultanate of Oman: 1988.

**Publisher's Note:** MDPI stays neutral with regard to jurisdictional claims in published maps and institutional affiliations.

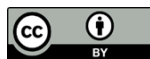

**Copyright:** © 2021 by the authors. Submitted for possible open access publication under the terms and conditions of the Creative Commons Attribution (CC BY) license (<http://creativecommons.org/licenses/by/4.0/>).

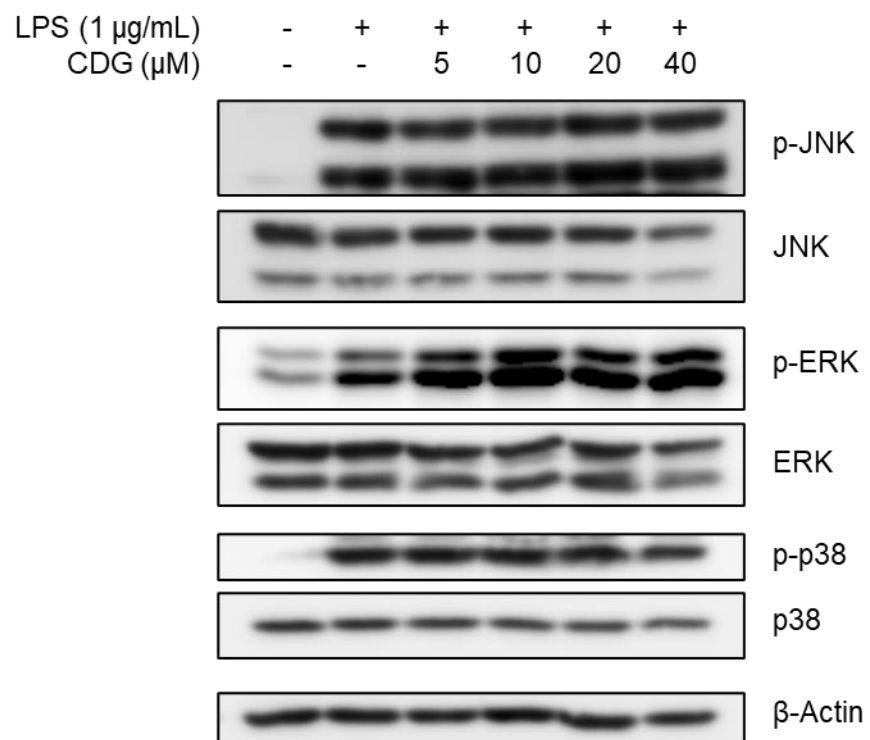

**Figure 1.** Effect of CDG on the MAPK pathway. The ImKC cells were treated with CDG (5, 10, 20, and 40  $\mu\text{M}$ ) for 2 h and stimulated by LPS (1  $\mu\text{g/mL}$ ) for 15 min. The cell lysates were used for the analysis of the phosphorylation of MAPK (ERK, JNK, and p38) by western blotting.  $\beta$ -actin was used as the loading control. CDG, catechin-7,4'-O-digallate; MAPK, mitogen-activated protein kinase; LPS, lipopolysaccharide. ERK, extracellular signal-regulated kinase; JNK, c-Jun N-terminal kinase.

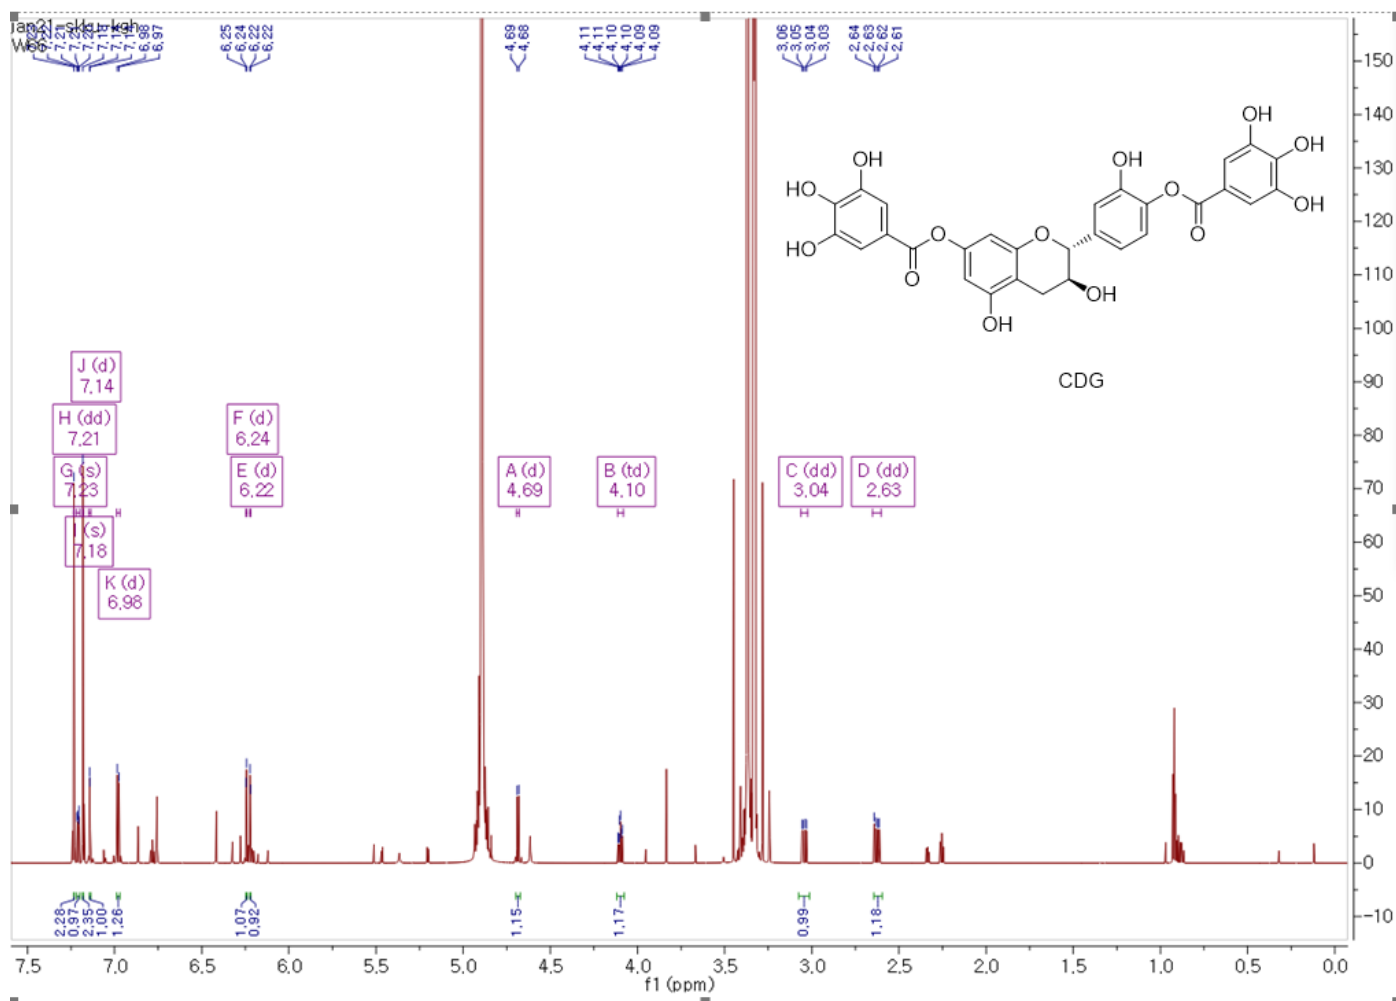

Figure S2.  $^1\text{H}$  NMR spectrum of catechin-7,4'-O-digallate (CDG) in  $\text{CD}_3\text{OD}$ .

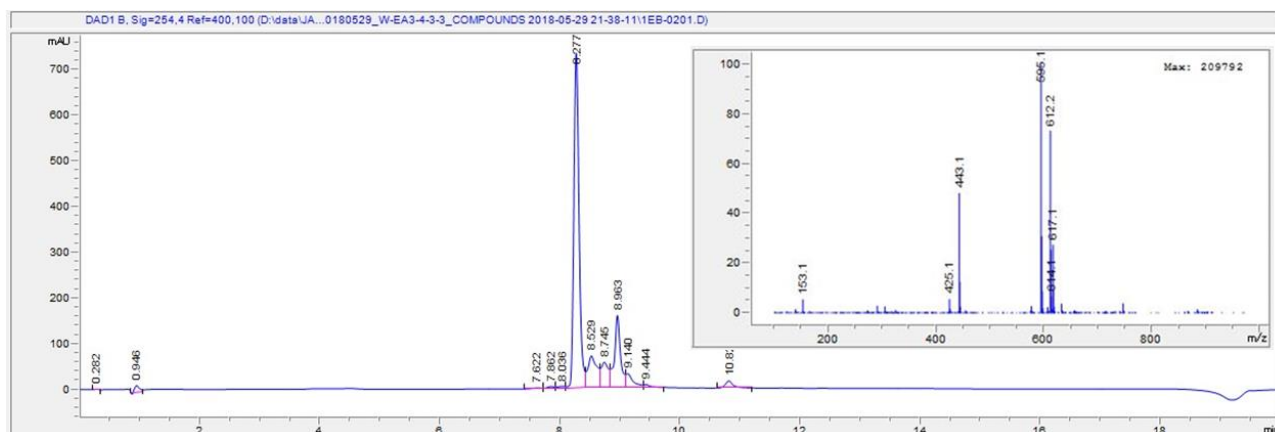

**Figure S3.** LC/MS analysis of CDG [ESIMS (positive-ion mode)  $m/z$ : 595.1  $[M + H]^+$  and  $m/z$ : 617.1  $[M + Na]^+$ . Detection wavelength was set at 254 nm; LC/MS analysis was performed on an Agilent 1200 Series HPLC system equipped with a diode array detector and 6130 Series ESI mass spectrometer using an analytical Kinetex C18 100 Å column (100 × 2.1 mm, 5 μm; flow rate: 0.3 mL/min; Phenomenex). The mobile phase was composed of 0.1% (w/v) formic acid in water (solvent A) and methanol (solvent B) in the following gradients; 0 min (A:B 90:10), 10 min (A:B 0:100), 11 min (A:B 0:100), 15 min (A:B 0:100), 16 min (A:B 90:10), and 20 min (A:B 90:10).].

**Table S1.** List of the primer sequences for qPCR. Primer sequences for inflammatory mediators and housekeeping genes. qPCR, quantitative PCR; iNOS, inducible nitric oxide synthase; IL, interleukin; TNF, tumor necrosis factor; GAPDH, glyceraldehyde-3-phosphate dehydrogenase.

| Target gene |            | Primer Sequence                           |
|-------------|------------|-------------------------------------------|
| iNOS        | Sense      | 5'-TGG CCA AGC TGA ACT-3'                 |
|             | Anti-Sense | 5'-TCA TGA TAA CGT TTC TGG CTC TT-3'      |
| IL-6        | Sense      | 5'-TCT AAT TCA TAT CTT CAA CCA AGA GG -3' |
|             | Anti-Sense | 5'-TGG TCC TTA GCC ACT CCT TC-3'          |
| IL-1β       | Sense      | 5'-TTG ACG GAC CCC AAA AGA-3'             |
|             | Anti-Sense | 5'-GAT GTG CTG CTG CGA GAT T-3'           |
| TNF-α       | Sense      | 5'-CTG TAG CCC ACG TCG TAG C-3'           |
|             | Anti-Sense | 5'-TTG AGA TCC ATG CCG TTG-3'             |
| GAPDH       | Sense      | 5'-AAC TTT GGC ATT GTG GG-3'              |
|             | Anti-Sense | 5'-ACA CAT TGG GGG TAG GAA CA-3'          |
| β-actin     | Sense      | 5'-TGT TAC CAA CTG GGA CGA CA-3'          |
|             | Anti-Sense | 5'-GGG GTG TTG AAG GTC TCA AA-3'          |
